# Supplementary material for: Amphipathic design dictates self-assembly, cytotoxicity and cell uptake of arginine-rich surfactant-like peptides
Source: Royal Society of Chemistry journal article supplement (doi:10.1039/c9tb02219h), 2020-01-01
Supplement: c9tb02219h1.pdf [file c9tb02219h1.pdf]

## SUPPORT INFORMATION

# Amphipathic Design Dictates Self-Assembly, Cytotoxicity and Cell Uptake of Arginine-rich Surfactant-like Peptides

Lucas R. Mello,<sup>a</sup> Rodrigo B. Aguiar,<sup>a</sup> Renata Y. Yamada,<sup>a</sup> Jane Z. Moraes,<sup>a</sup> Ian W. Hamley,<sup>b</sup> Wendel A. Alves,<sup>c</sup> Mehedi Reza,<sup>d</sup> Janne Ruokolainen<sup>d</sup> and Emerson R. Silva<sup>a\*</sup>

<sup>a</sup>Departamento de Biofísica, Universidade Federal de São Paulo, 04044-020, São Paulo, Brazil; <sup>b</sup>Department of Chemistry, University of Reading, Whiteknights, Reading RG6 6AD, UK; <sup>c</sup>Centro de Ciências Naturais e Humanas, Universidade Federal do ABC, 09210-580, Santo André, Brazil; <sup>d</sup>Department of Applied Physics, Aalto University School of Science, P.O. Box 15100, FI-00076 Aalto, Finland.

- ⇒ Chromatography and mass spectrometry data;
- ⇒ CD experiments;
- ⇒ Table with SAXS fitting parameters;
- ⇒ AFM topography images;
- ⇒ Cell fluorescence imaging.

## CHROMATOGRAPHY AND MASS SPECTROSCOPY DATA

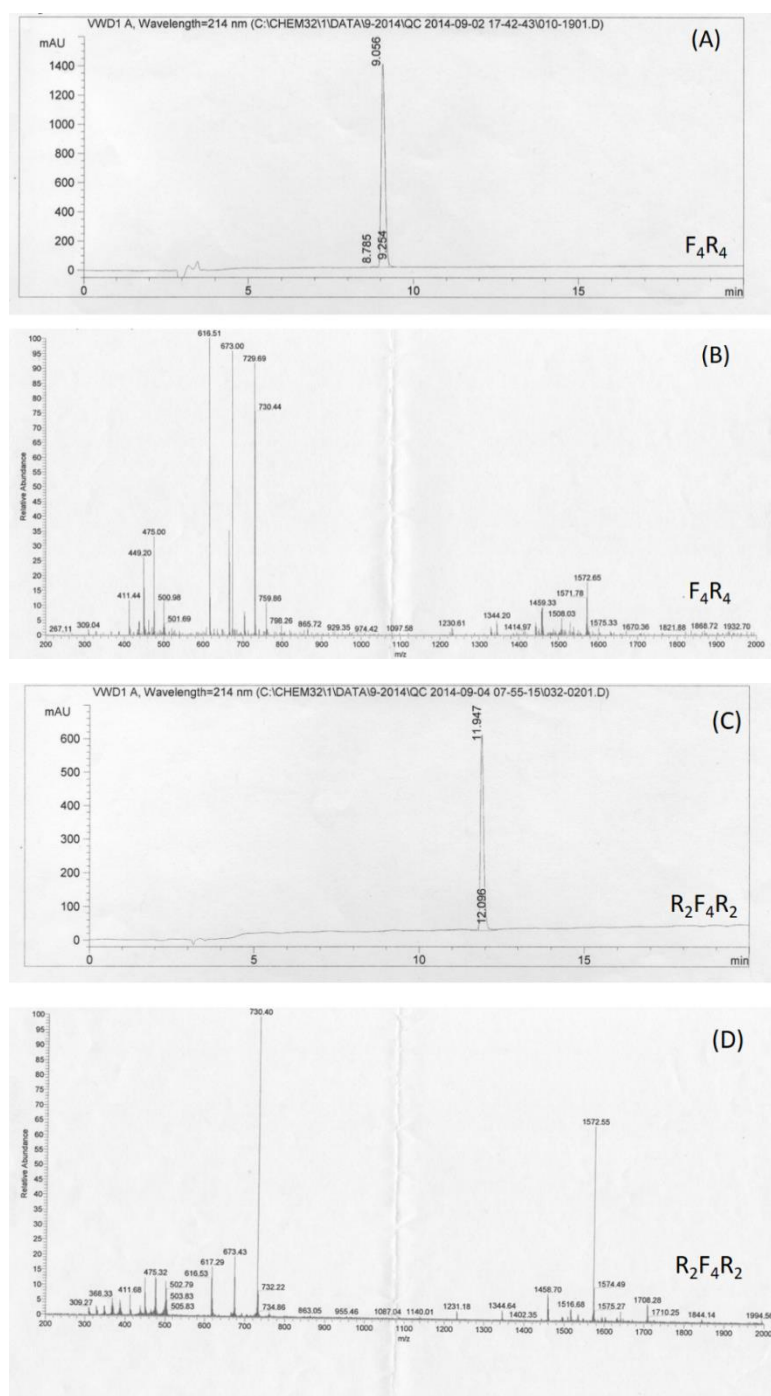

**Fig. S1.** Chromatograms and mass spectra from diblock peptides (A and B) and from the bolaamphiphile variants (C and D).

## CD EXPERIMENTS

**Experimental procedure:** CD data were obtained using a JASCO 810 instrument, from samples prepared at 50 mg/ml, carefully placed between the windows of demountable quartz cuvettes with 0.1 mm pathlength. A total of 6 accumulations were obtained, in the range 190-250 nm, 1 nm per step, at 50 nm/min. All curves were background subtracted and curves were smoothed with FFT filters (window = 5 points) to eliminate stochastic noise

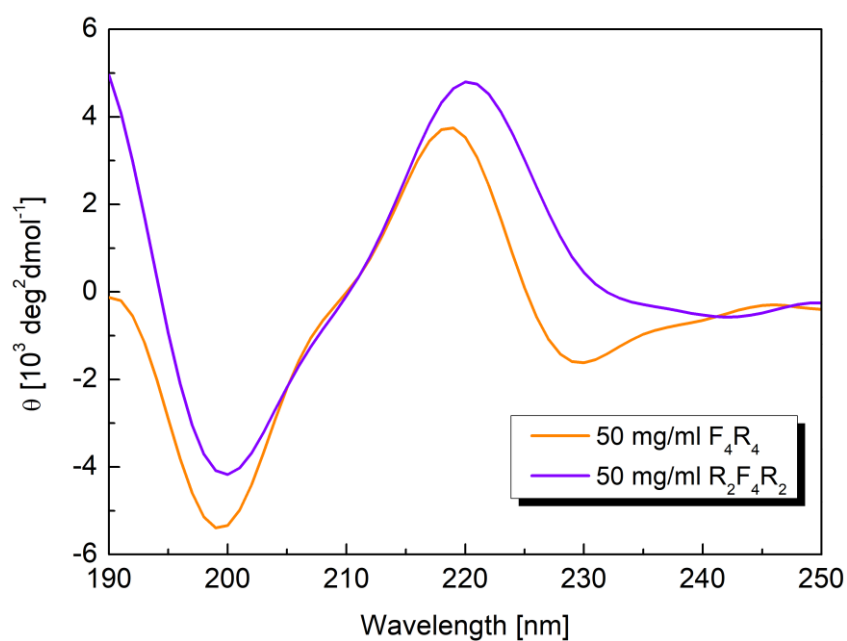

**Fig. S2.** Circular dichroism spectra from solutions containing amphipathic peptides at 50 mg/ml.

## SAXS FITTING PARAMETERS

**Table S1.** Summary of structural parameters arising from model fits of SAXS data shown in Figure 3.  $R_g$  = radius of gyration of mass fractal objects,  $R_c$  = inner radius of sphere or cylinder shells,  $\Delta R$  = shell thickness,  $L$  = length of rod-like objects,  $\sigma_H$  = standard deviation of Gaussian function describing bilayer polar heads,  $\sigma_C$  = standard deviation of Gaussians describing bilayer hydrophobic core,  $t$  = separation between centers of Gaussians used for describing polar headgroups. Uncertainties associated to radii of polydisperse sphere/cylinder shells correspond to standard deviations of Gaussian distributions.

| Peptide                                        | Conc.<br>(mg/ml) | Mass Fractal                | Spherical<br>Shell                                   | Cylinder<br>Shell                                                         | Gaussian<br>Bilayer                                        |
|------------------------------------------------|------------------|-----------------------------|------------------------------------------------------|---------------------------------------------------------------------------|------------------------------------------------------------|
| <b>F<sub>4</sub>R<sub>4</sub></b>              | 10               | $R_g = 0.8$ nm<br>$d = 2.7$ | $R_c = 19.2$<br>$\pm 16.0$ nm<br>$\Delta R = 6.5$ nm | *****                                                                     | *****                                                      |
|                                                | 50               | $R_g = 0.7$ nm<br>$d = 2.9$ | *****                                                | $R_c = 3.2$<br>$\pm 1.9$ nm<br>$\Delta R = 4.2$<br>nm                     | *****                                                      |
|                                                | 100              | $R_g = 0.8$ nm<br>$d = 2.7$ | *****                                                | $R_c = 2.0$<br>$\pm 1.7$ nm<br>$\Delta R = 4.2$<br>nm<br>$L = 76.5$<br>nm | *****                                                      |
| <b>R<sub>2</sub>F<sub>4</sub>R<sub>2</sub></b> | 10               | $R_g = 0.8$ nm<br>$d = 2.8$ | *****                                                | *****                                                                     | $\sigma_H = 0.8$ nm<br>$\sigma_C = 1.2$ nm<br>$t = 2.9$ nm |
|                                                | 50               | $R_g = 0.6$ nm<br>$d = 2.8$ | *****                                                | *****                                                                     | $\sigma_H = 0.5$ nm<br>$\sigma_C = 1.2$ nm<br>$t = 2.2$ nm |
|                                                | 100              | $R_g = 0.7$ nm<br>$d = 2.9$ | *****                                                | *****                                                                     | $\sigma_H = 0.6$ nm<br>$\sigma_C = 1.4$ nm<br>$t = 3.3$ nm |

## AFM IMAGING FROM CONCENTRATED SOLUTIONS

**Experimental procedure:** AFM measurements from concentrated samples were performed using a Park NX10 instrument operating in tapping mode (LNNano, Campinas-Brazil). Droplets from peptide aqueous solutions were deposited onto the surface of freshly cleaved mica substrates and left to rest for about 5 minutes. The substrates were then rinsed with ultrapure water and left to dry overnight into desiccators. All measurements were carried out at room temperature with controlled humidity (< 3%), using  $512 \times 512$  pixels, at scan rate of 0.3 Hz and cantilever frequency at  $\sim 190$  kHz.

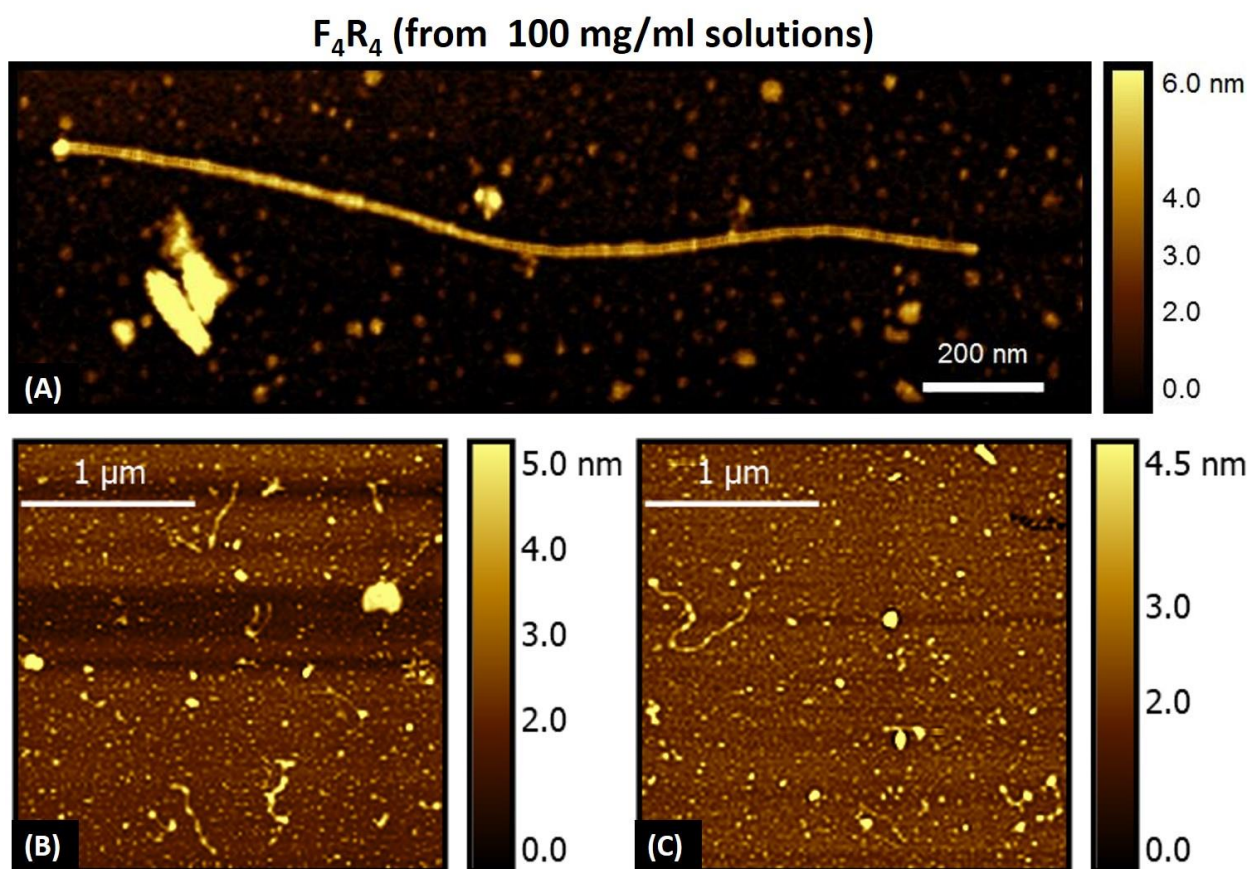

**Fig. S3.** Topography images from F<sub>4</sub>R<sub>4</sub> nanoparticles obtained from solutions prepared at 100 mg/ml. The presence of worm-like assemblies is observed alongside globular aggregates.

$R_2F_4R_2$  (from 100 mg/ml solutions)

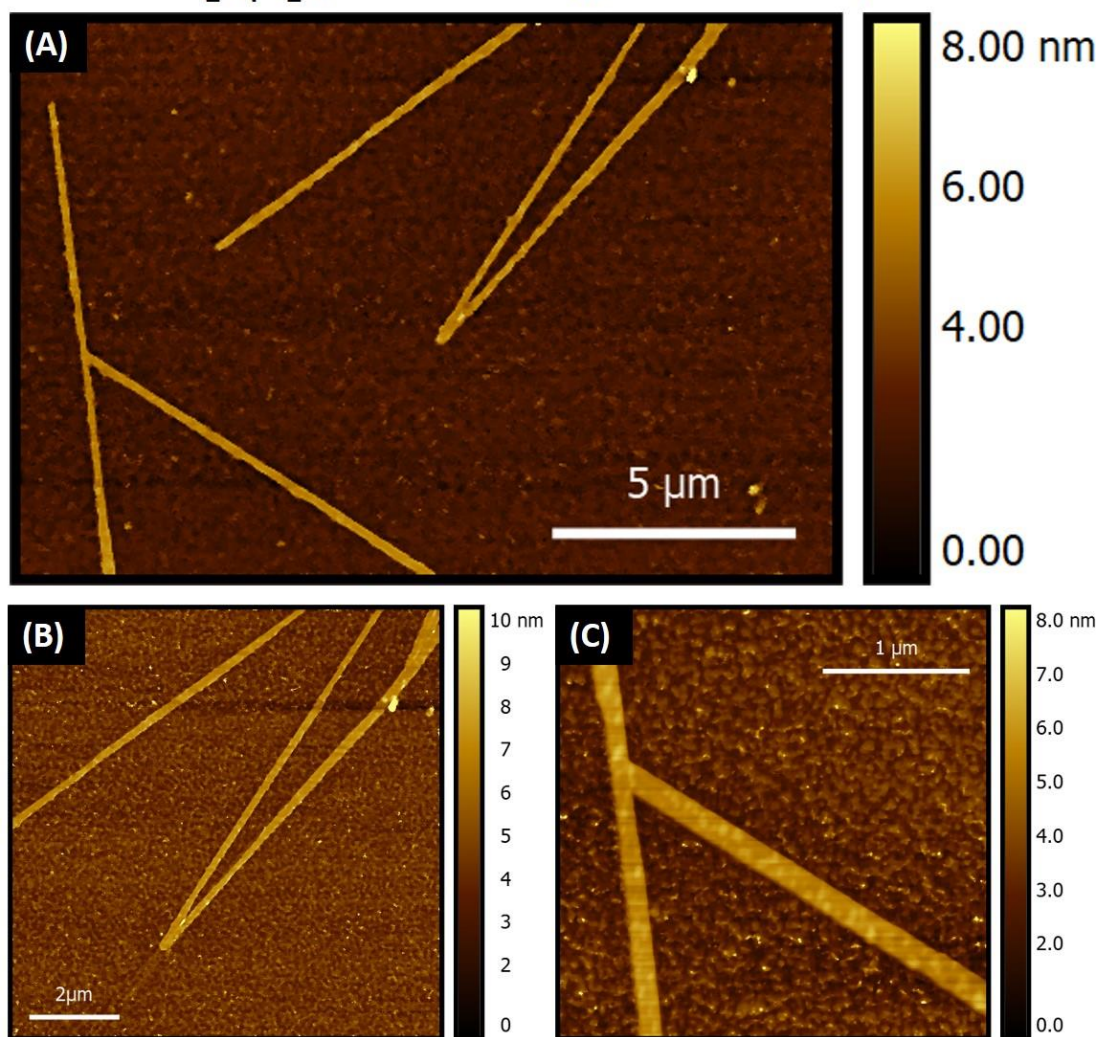

**Fig. S4.** Topography images from assemblies obtained from 100 mg/ml  $R_2F_4R_2$  solutions. The extensive presence of interconnected tape-like (rigid) assemblies is observed across the sample.



## AFM IMAGING FROM DILUTED SOLUTIONS

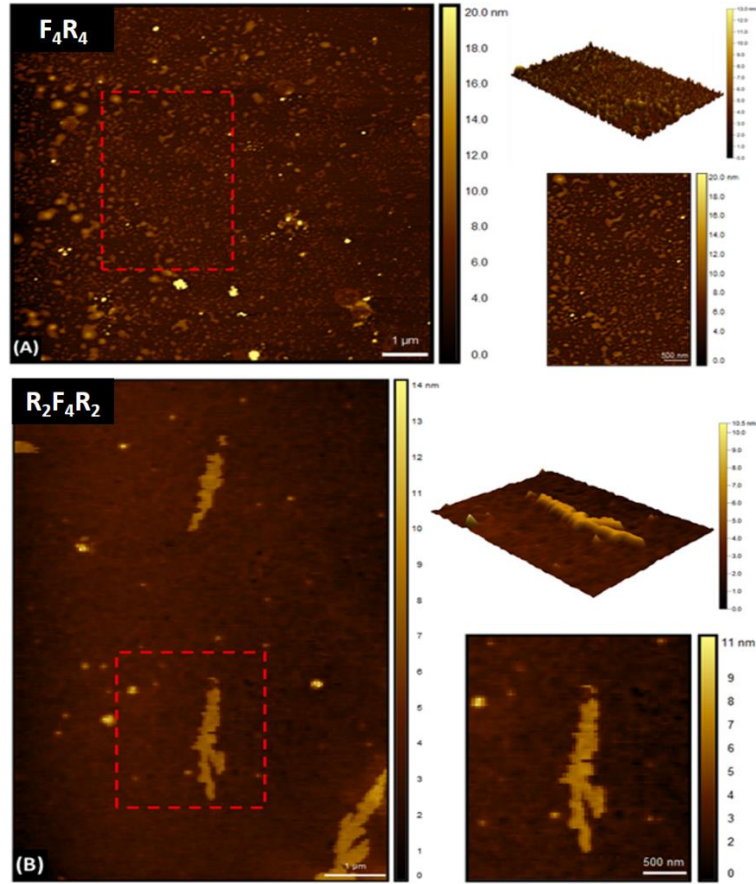

**Fig. S5.** AFM micrographs from dried solutions containing peptides at 1 mg/mL. Dashed squares indicate magnification zones and at the right upper corner of each image there is a 3D reconstruction of the samples. Globular aggregates from  $F_4R_4$  samples have average diameter of  $92 \pm 61$  nm ( $n = 200$ ).

## AFM IMAGING FROM BIOTIN-LABELED PEPTIDES

**Experimental procedure:** AFM measurements from biotin-labelled peptides were performed on a Park XE7 instrument at Analitica LTDA (Sao Paulo, Brazil). The microscope operated in tapping mode, at scan rate of 0.3 Hz and tip frequencies near to 190 kHz. Samples from peptide solutions were prepared in the same manner described above (see Fig. S3 and S4). All measurements were carried out at room temperature. Data treatment was carried out using the software Gwyddion.

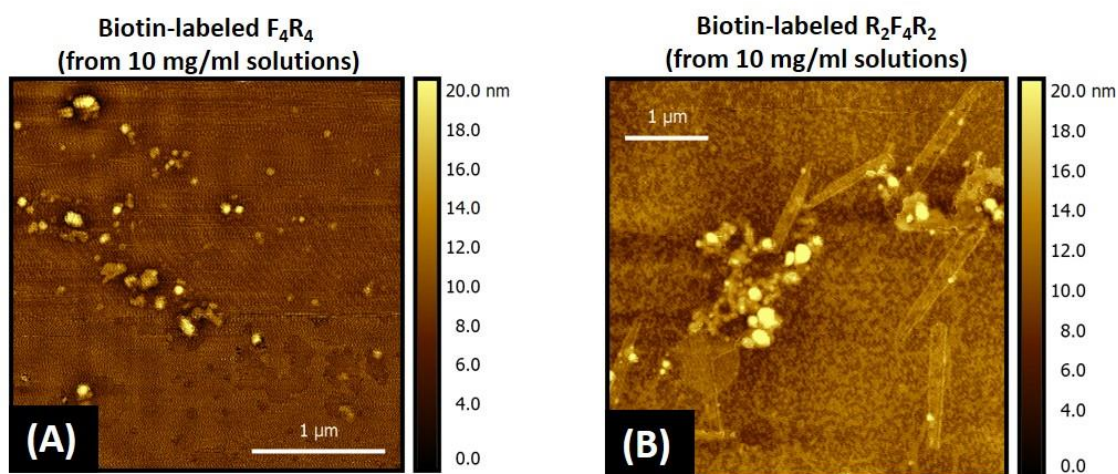

**Fig. S6.** AFM topography images from nanoparticles obtained from self-assembly peptides labelled with the biotin probe. Biotin-labelled F<sub>4</sub>R<sub>4</sub> is found to self-assemble into globular particles, whereas the bolaamphiphilic R<sub>2</sub>F<sub>4</sub>R<sub>2</sub> appears organized into tape-like structures coexisting with round aggregates.



## CELL FLUORESCENCE IMAGING

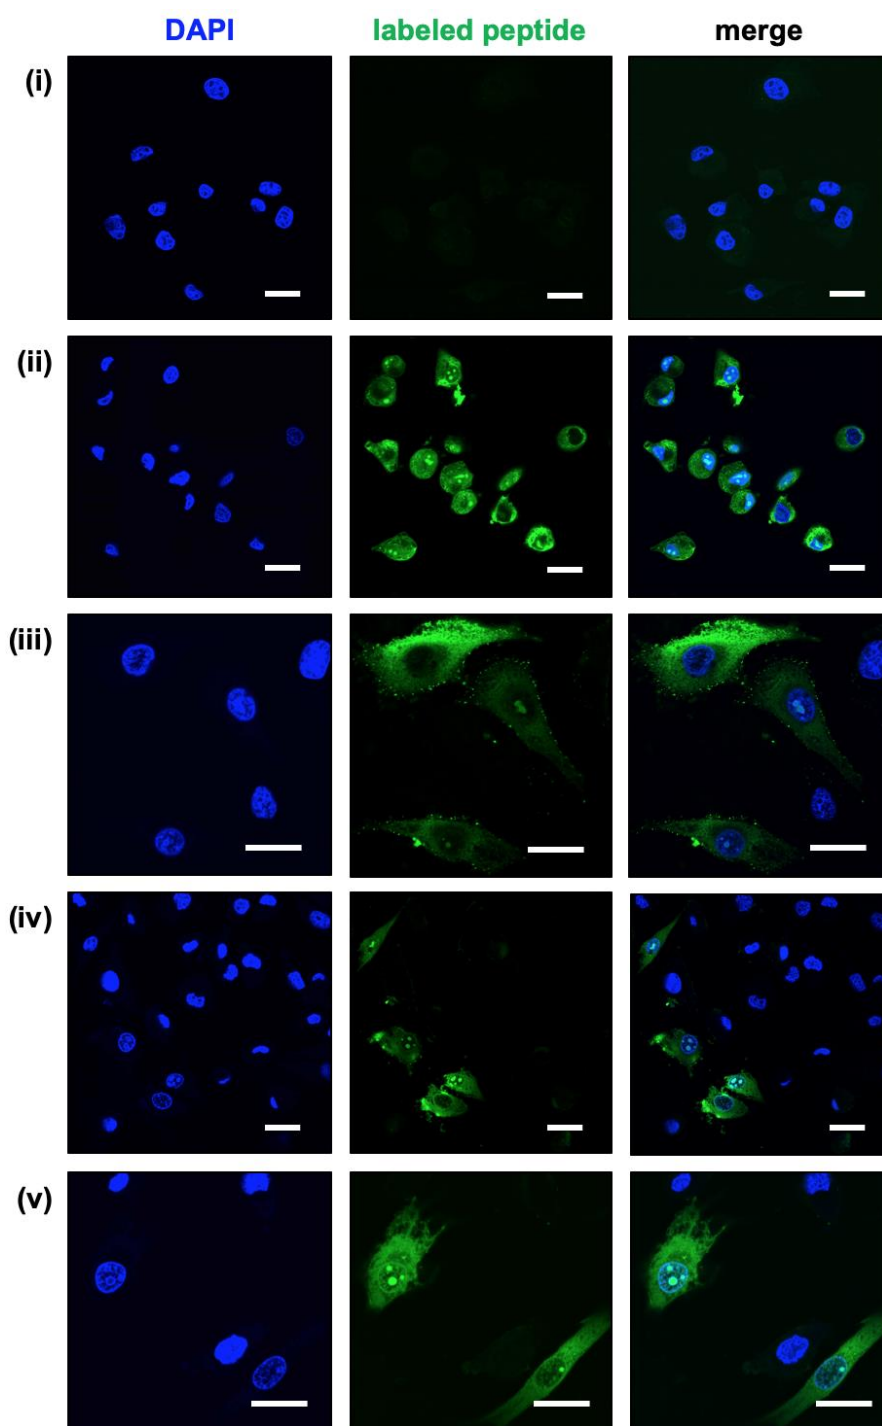

**Fig. S7.** Confocal fluorescence images used to construct the panels (i-v) provided in Fig. 5A (see main text). Images show the detection of DAPI (blue; left column) and the labeled peptide (green; middle column) on SK-Mel28 cells exposed for 30 min to R<sub>4</sub>F<sub>4</sub> or R<sub>2</sub>F<sub>4</sub>R<sub>2</sub>. The merged images are on the right column. DAPI stains nuclei and biotin-labeled peptides (green) were detected with Alexa Fluor® 488-conjugated streptavidin staining. Scale bar, 25  $\mu$ m.
